# Supplementary material
Source: PubMed Central journal article supplement (PMC3807199)

## IL-12p40

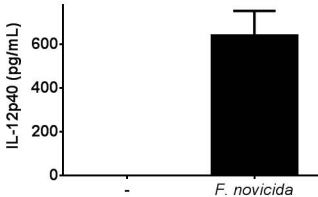

## IL-10

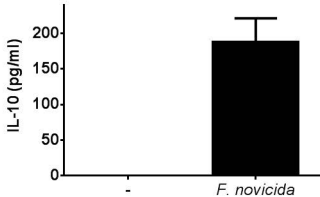

Supplement: CVI.00319-13_zcd999094840so1.pdf [file CVI.00319-13_zcd999094840so1.pdf]

**IL-12p40**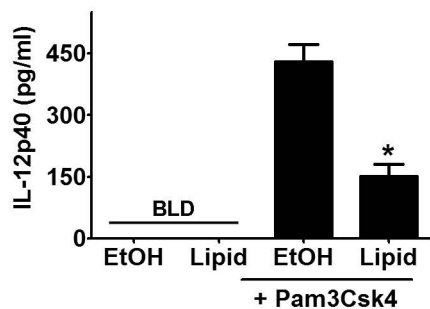**IL-6**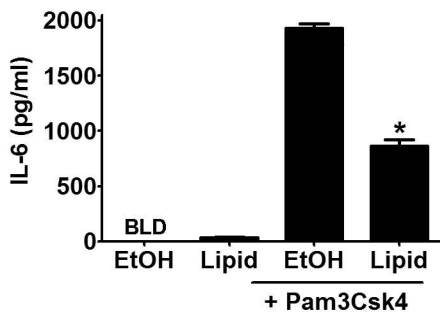**IL-12p40**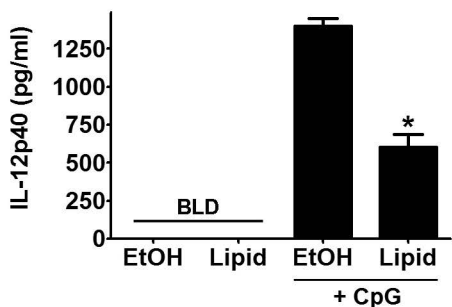**IL-6**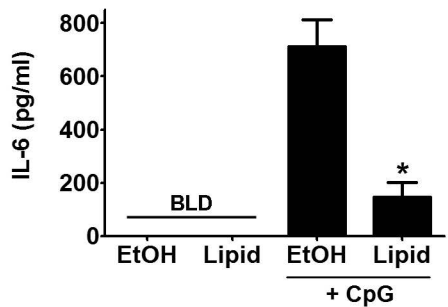**IL-12p40**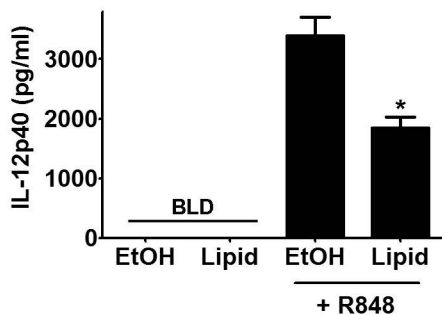**IL-6**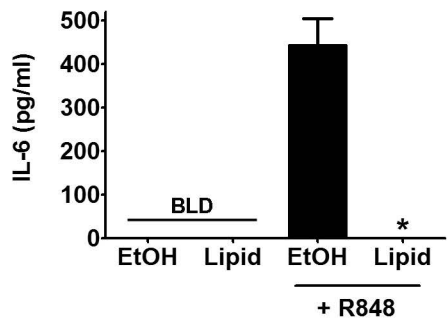

Supplement: CVI.00319-13_zcd999094840so2.pdf [file CVI.00319-13_zcd999094840so2.pdf]
